# Supplementary material
Source: Research Square preprint supplement (doi:10.21203/rs.3.rs-8938964/v1)
Supplement: Supplementary file 1 [file d10aba26558b7d500f861d11.docx]

**Supplementary material 1: Interview Form**

**Interview Questions**

1. Could you briefly introduce yourself?

(Your gender? Your age? Which hospital do you work at? Which unit do you work in? Your level of education? How many years have you been practicing nursing?)

1. What would you like to say about professionalization in nursing?

(What comes to mind when you think of professionalization in nursing?)

1. What are your views regarding nursing education as one of the criteria of professionalization?
2. (What is its role in professionalization? In your opinion, what is its importance/priority within the professionalization process?)
3. What are your thoughts on nursing-specific scientific knowledge? (What is its role and importance/priority in professionalization?)
4. In your opinion, what is the role and importance/priority of professional organization in the professionalization process?
5. How do you think the nursing profession is perceived by society?

(How did the COVID-19 pandemic affect society’s perception of the nursing profession?)

1. What are your views on nurses’ levels of decision-making in their own professional practice? (What are your views on autonomy? What is its role and importance/priority in professionalization?)
2. What do professional ethical principles mean to you? (For you, what is the role and importance/priority of the existence of ethical codes in professionalization?)
