# Supplementary material
Source: Research Square preprint supplement (doi:10.21203/rs.3.rs-8938964/v1)
Supplement: Supplementary file 1 [file ed1e8ca70e6f9d3eea6b4777.docx]

**Supplementary material 2: Informed Consent Form**

**Title of the Study:** Nursing Professionalism, As Perceived by Nurses from Different Generations In Türkiye: A Qualitative Study

Dear Participant,

This study is being conducted under the supervision of Prof. Dr. Aytolan YILDIRIM and the responsibility of doctoral student Filiz COŞKUN. It aims to evaluate nursing professionalism through a qualitative research design by exploring the perspectives of nurses from different generations. The research will be carried out with nurses working in various institutions and belonging to different generations in Istanbul.

Data for the study will be collected through one-on-one interviews using a semi-structured interview form, with each interview lasting approximately 30–60 minutes. During the interview, participants are expected to respond to the questions posed by the researcher based on their own experiences. Participation in this study is entirely voluntary. You have the right to withdraw from the study at any time, and the researcher also reserves the right to exclude participants if deemed necessary.

To ensure accurate and complete collection of your responses, audio recording devices will be used during the interviews. Information obtained from this study will not be used for purposes other than research, and your identity will be kept confidential both during the research process and in any publications by encrypting identifying information. You will not receive any payment for participating in this study, nor will you be charged any fees.

Participant Declaration

The information regarding the research conducted by doctoral student Filiz COŞKUN has been communicated to me. I understand that I can contact the researcher, Filiz COŞKUN, at +90 538 481 13 88 if needed at any stage of the study.

After receiving this information, I have been invited to participate in this research. I am confident that the confidentiality of my personal information will be ensured if I participate in this study. I have been given sufficient information and assurance that my personal information will be protected during the use of research results for educational and scientific purposes. I understand all explanations provided to me and voluntarily agree to participate in this research under these conditions.

Participant Name-Surname:

Signature:
